# Supplementary material for: Characterisation of Thinopyrum bessarabicum chromosomes through genome-wide introgressions into wheat
Source: PubMed Central journal article supplement (PMC5787220; doi:10.1007/s00122-017-3009-y), 2017-11-03
Supplement: 122_2017_3009_MOESM2_ESM.pdf [file 122_2017_3009_MOESM2_ESM.pdf]

**Online Resource 2** Number of SNP markers in each segmental block (SB) for each linkage group (LG) of the *Th. bessarabicum* physical map of the J genome

|              | SB 1 | SB 2 | SB 3 | SB 4 | SB 5 | SB 6 | SB 7 | SB 8 | Total |
|--------------|------|------|------|------|------|------|------|------|-------|
| <b>LG 1J</b> | 25   | 19   | 67   | 13   | -    | -    | -    | -    | 124   |
| <b>LG 2J</b> | 80   | 13   | 48   | 41   | 7    | -    | -    | -    | 189   |
| <b>LG 3J</b> | 46   | 18   | 63   | 35   | 23   | -    | -    | -    | 185   |
| <b>LG 4J</b> | 38   | 23   | 94   | -    | -    | -    | -    | -    | 155   |
| <b>LG 5J</b> | 59   | 10   | 4    | 4    | 151  | -    | -    | -    | 228   |
| <b>LG 6J</b> | 14   | 33   | 5    | 33   | 17   | 2    | -    | -    | 104   |
| <b>LG 7J</b> | 46   | 32   | 12   | 4    | 26   | 22   | 22   | 1    | 165   |
